# Supplementary material
Source: Springer Nature journal article supplement (https://www.springermedizin.de/resource/supplementary/12997_2006_32_MOESM2_ESM.pdf/9623148)

## Citric Acid

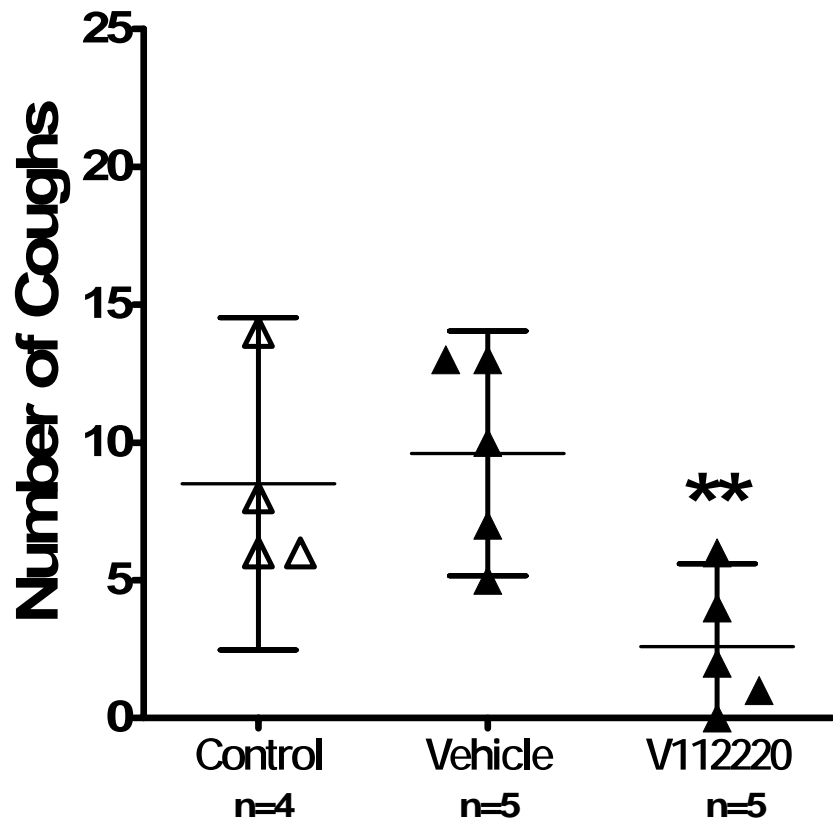

## Capsaicin

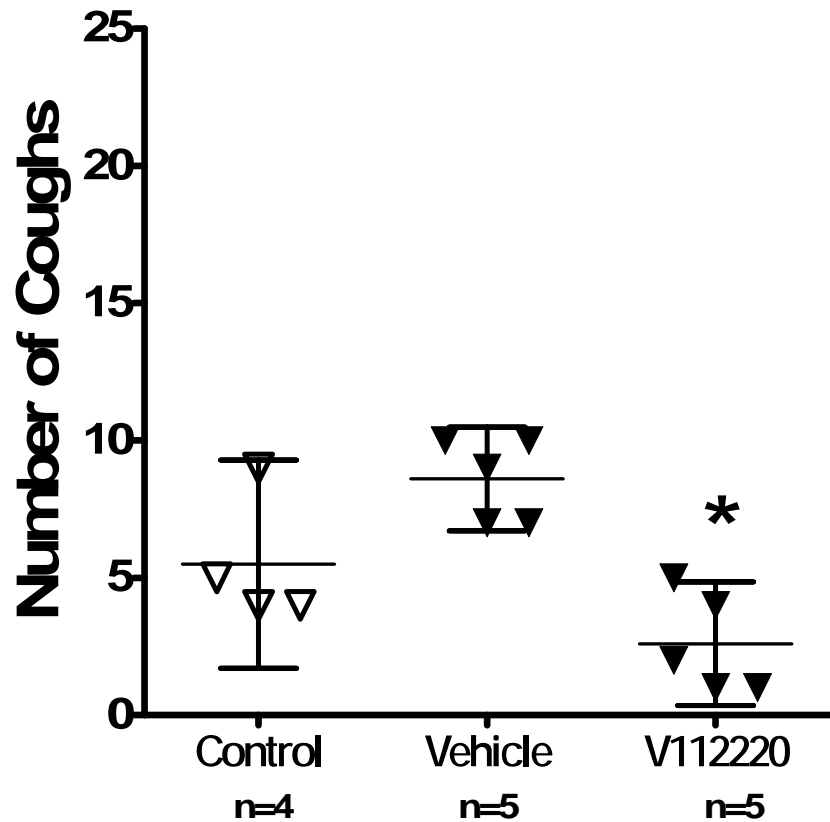

Supplement: MOESM2 [file 9623148]
